# Supplementary material for: Peptide YY Regulates Bone Remodeling in Mice: A Link between Gut and Skeletal Biology
Source: PLoS One. 2012 Jul 6;7(7):e40038. doi: 10.1371/journal.pone.0040038 (PMC3391226; doi:10.1371/journal.pone.0040038)
Supplement: Table S5 — Cortical bone phenotype in the mid femora of male and female PYYtgROSACre mice. Means ± SE of 4–12 mice per group shown. a indicates p<0.05, b indicates p<0.10 versus wild-type. (DOC) [file pone.0040038.s005.doc]

Table S5. Cortical bone phenotype in the mid femora of male and female PYYtgROSACre mice.

| **MALES** | **PYYtgROSAWT** | **PYYtgROSACre** |
| --- | --- | --- |
| Total cross-sectional area (mm2) | 2.51  0.09 | 2.25  0.10 b |
| Cortical bone area (mm2) | 0.98  0.04 | 0.90  0.03 |
| Marrow area (mm2) | 1.52  0.06 | 1.36  0.08 |
| Cortical area fraction (%) | 39.3  1.0 | 40.0  1.3 |
| Cortical thickness (mm) | 199  6 | 192  5 |
| Periosteal perimeter (mm) | 6.14  0.11 | 5.83  0.13 b |
| Endosteal perimeter (mm) | 4.95  0.11 | 4.67  0.15 |
| Mean polar moment of inertia (mm4) | 0.67  0.05 | 0.55  0.04 b |
| **FEMALES** | **PYYtgROSAWT** | **PYYtgROSACre** |
| Total cross-sectional area (mm2) | 1.80  0.03 | 1.70  0.03 a |
| Cortical bone area (mm2) | 0.92  0.02 | 0.86  0.01 a |
| Marrow area (mm3) | 0.88  0.02 | 0.84  0.03 |
| Cortical area fraction (%) | 51.3  0.8 | 50.7  0.8 |
| Cortical thickness (m) | 232  4 | 224  3 |
| Periosteal perimeter (mm) | 5.17  0.05 | 5.06  0.06 |
| Endosteal perimeter (mm) | 3.70  0.05 | 3.62  0.06 |
| Mean polar moment of inertia (mm4) | 0.41  0.01 | 0.37  0.01 a |

#### Means  SE of 4‑12 mice per group shown. *a* indicates *p* < 0.05, *b* indicates *p* < 0.10 versus wild-type**.**
